# Supplementary material for: High-performance organic solar cells enabled by the p-i-n structure and ternary strategy
Source: Royal Society of Chemistry journal article supplement (doi:10.1039/d4ta05389c), 2024-01-01
Supplement: d4ta05389c1.pdf [file d4ta05389c1.pdf]

## Supplementary Information

### High-Performance Organic Solar Cells Enabled by P-i-N Structure and Ternary Strategy

Ju Zhao,<sup>a</sup> Jiabin Zhang,<sup>a</sup> Yuejia Dou,<sup>a</sup> Kai Zhang,<sup>\*a</sup> Chang Zhu,<sup>a</sup> Zuiyi Zhong<sup>a</sup> and Fei Huang<sup>\*a</sup>

<sup>a</sup> Institute of Polymer Optoelectronic Materials and Devices, Guangdong Basic Research Center of Excellence for Energy & Information Polymer Materials, State Key Laboratory of Luminescent Materials and Devices, South China University of Technology, Guangzhou 510640, P. R. China

*E-mail address:* mszhangk@scut.edu.cn (K. Zhang); msfhuang@scut.edu.cn (F. Huang).

\* Corresponding Authors

#### Experimental Methods

##### 1. Materials and experimental procedures

###### Materials

PBQx-TF, ZY-4Cl was purchased from Solarmer Materials Inc. DT-Y6 and PNDIT-F3N was purchased from Dongguan Volt Ampere Photoelectric Technology Co., Ltd. PEDOT:PSS ((CLEVIOS P VP AI 4083) was purchased from Heraeus. The alcohol-soluble conjugated polymer PNDIT-F3N was synthesized in our lab according to the reported literature<sup>1</sup>. All solvents and materials were commercially available and used received.

###### Device fabrication

The devices were fabricated with conventional structures of ITO/PEDOT:PSS/active layer/PNDIT-F3N/Ag. The ITO substrates were cleaned sequentially by detergent, deionized water, and isopropanol under sonication, and then dried at 65 °C in a baking oven. After being treated with oxygen plasma, PEDOT: PSS layer (~30 nm) was spin-coated on the top of ITO and annealed in the air at 150 °C for 15 min. For the BHJ film, the active materials were dissolved in toluene (Tol) at 80 °C for 2 hours. The system of PBQx-TF:DT-Y6, PBQx-TF:DT-Y6:ZY-4Cl with a ratio of 1:1.2 and 1:0.9:0.3, respectively (PBQx-TF=6mg/mL). The blend solvent was spin-coated at 2000 rpm for PBQx-TF:DT-Y6 and 2500 rpm for PBQx-TF:DT-Y6:ZY-4Cl. Then all the films were annealed at 100 °C for 10 min. For the LBL film, the PBQx-TF was dissolved in *o*-XY with a concentration of 8 mg/ mL at 80 °C for 2 hours.

For the binary system, the acceptor DT-Y6 with a concentration of 7.2 mg/ mL was dissolved in Tol at 60 °C for 2 hours. For the ternary system, the DT-Y6:ZY-4Cl (0.75:0.25) with a total concentration of 7.2 mg/ mL was dissolved in Tol at 60 °C for 2 hours. Then the donor was spin-coated on the PEDOT:PSS to form a 60 nm film, and the acceptor was spin-coated to form a 50 nm film. Afterward, a ~10 nm PNDIT-F3N was spin-coated on the active layer as an electron transport layer. Finally, 100 nm Ag was deposited by thermal vacuum evaporation under  $10^{-6}$  mbar and finally obtained a 0.0516 cm<sup>2</sup> active area device. The effective area of the device was confined to 0.04 cm<sup>2</sup> by a non-refractive mask to improve the accuracy of measurements.

## 2. Measurements and characterization

**Photovoltaic performance measurement:** The current density-voltage ( $J$ - $V$ ) curves of devices were recorded by a Keithley 2400 source meter under 1 sun, AM 1.5 G spectra from a solar simulator (Taiwan, Enlitech). The light intensity was 100 mW·cm<sup>-2</sup> as calibrated by a China General Certification Center (CGC) certified reference monocrystal silicon cell (Enlitech).

**External quantum efficiency (EQE):** The EQE spectra were measured by the Enlitech QE-R3011 measurement system.

**UV-Vis spectra:** UV-Vis absorption spectra were recorded by a PerkinElmer Lambda UV-Vis spectrophotometer.

**SCLC measurements:** For single-carrier devices, those devices were fabricated to measure hole and electron mobility by using the SCLC method. The hole-only device structures were ITO/PEDOT:PSS/active layer/MoO<sub>3</sub>/Ag. The electron-only device structures were ITO/ZnO/Active layer/PNDIT-F3N/Ag. The charge carrier mobility was determined by fitting the dark current to the model of a single-carrier SCLC according to the equations<sup>2</sup>:  $J=(9/8)\epsilon_0\epsilon_r\mu V^2 d^{-3}$  and  $V=V_{\text{appl}}-V_{\text{bi}}-V_s$ , where  $J$  is the current density,  $d$  is the film thickness of the active layer,  $\mu$  is the charge carrier mobility,  $\epsilon_r$  is the relative dielectric constant of the transport medium,  $\epsilon_0$  is the permittivity of free space,  $V_{\text{appl}}$  is the applied voltage and  $V_{\text{bi}}$  is the offset voltage. The carrier mobility can be calculated from the slope of the  $J^{1/2}$ - $V$  curves.

**Photo-CELIV, C-V, EIS, and Capacitance-frequency (C- $\omega$ ) measurements:** Photo-CELIV, C- $\omega$ , and EIS were obtained from a platform namely PAIOS which contains the characterization of Solar Cells and OLED. Photo-CELIV measurements (ramp rate 200 V ms<sup>-1</sup>, delay time: 0 s, offset voltage: 0 V, lightpulse length: 100  $\mu$ s) were also performed using PAIOS for different light intensities. C-V measurements were tested within the voltage range

from -3 V to 2 V under dark condition. The Mott-Shottky equation is described as the equation

$\frac{1}{C^2} = \frac{2(V_{bi} - V)}{A^2 q \epsilon_r \epsilon_0 N}$ ,  $C$  is the capacitance value,  $V$  is the applied voltage,  $A$  is the device area,  $q$  is the elementary charge,  $\epsilon_r$  is the relative permittivity,  $\epsilon_0$  is the vacuum permittivity, and  $N$  is the charge carrier density<sup>3</sup>. EIS measurements were conducted using a commercially available PAIOS. The measurements were performed using conditions that had an applied bias of open-circuit voltage of OPV in the dark, and a frequency ranging from 10 MHz to 1 Hz. The  $C$ - $\omega$  measurement was performed from 10 MHz to 1 Hz under dark environment. Mott-Schottky measurement was tested within the voltage range from -3 V to 2 V under dark conditions.

**TPV, TPC measurements:** The transient photocurrent and transient photovoltage characteristics of devices were measured by applying 500 nm laser pulses with a pulse width of 120 fs and low pulse energy to the short-circuit devices in the dark. The laser pulses were generated from an optical parametric amplifier (TOPAS-Prime) pumped by a mode-locked Ti:sapphire oscillator seeded regenerative amplifier with a pulse energy of 1.3 mJ at 800 nm and a repetition rate of 1 kHz (Spectra Physics Spitfire Ace). The charge extraction time was extracted from the fitting line of the TPC signal with the equation:  $\delta I = A \exp(t/T)$ , where  $A$  is a constant that fits the peak high,  $t$  is time, and  $T$  is the charge extraction time. The transient photovoltage was tested under the open-circuit condition to explore the photovoltage decay. The photovoltage decay kinetics of all devices follow a mono-exponential decay:  $\delta V = A \exp(-t/T)$ , where  $t$  is the time, and  $T$  is the charge carrier lifetime.

**Vertical component distribution characterization:** The surface energy of films was obtained by VCA15 surface contact angle analyzer (Data physics). The depth-profile data were obtained with a time of flight secondary ion mass spectrometry (TOF-SIMS) (ION-TOF GmbH, Germany) instrument in negative mode (sputter condition: a 2.5 keV Bi<sup>3+</sup> beam; Area: 300  $\mu\text{m}$   $\times$  300  $\mu\text{m}$ ; analysis condition: a 30 keV Bi<sup>3+</sup> beam; Area: 150  $\mu\text{m}$   $\times$  150  $\mu\text{m}$ )<sup>4</sup>.

**Atomic force microscope (AFM) measurement:** AFM measurements were performed by a Digital Instrumental DI Multimode Nanoscope III in a tapping mode.

**Transmission electron microscopy (TEM) measurement:** TEM measurements were conducted by JEM-2100F instrument.

**Grazing incidence Wide Angle X-ray Scattering (GIWAXS) measurement:** GIWAXS measurements were performed by Xeuss 2.0 SAXS/WAXS laboratory beamline using a Cu X-ray source (8.05 keV, 1.54  $\text{\AA}$ ) and a Pilatus3R 300K detector.

**$E_{\text{loss}}$  measurement:** the highly sensitive EQE was conducted by an integrated system with a Fourier transform photocurrent meter (QE Pro and NIR Quest 512, Ocean Optics)<sup>5</sup>. Electroluminescence quantum efficiency ( $\text{EQE}_{\text{EL}}$ ) was tested by applying an external current/voltage source through the OSCs (REPS-Pro, Enlitech).

### 3. Supplementary Figures and Tables

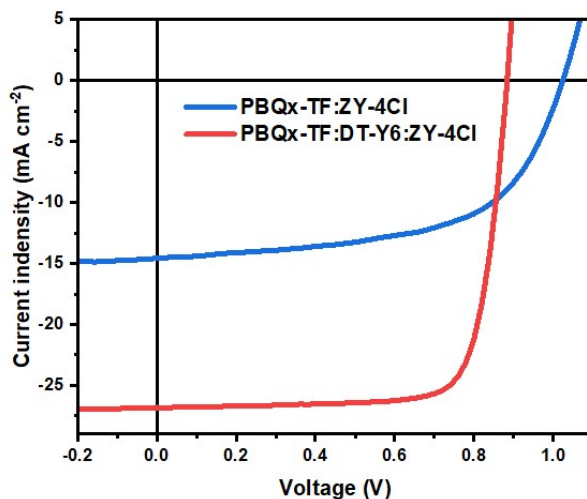

**Fig. S1** The J-V curves of PBQx-TF: ZY-4Cl and PBQx-TF: DT-Y6: ZY-4Cl

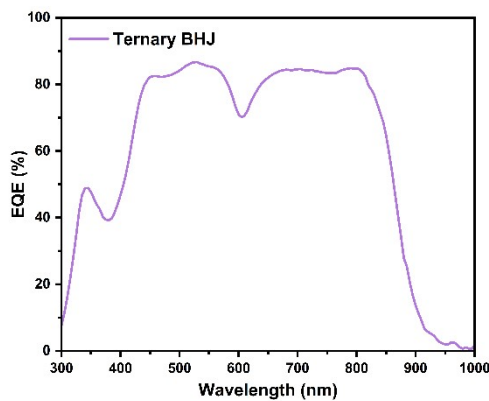

**Fig. S2** The EQE spectra of PBQx-TF: DT-Y6: ZY-4Cl.

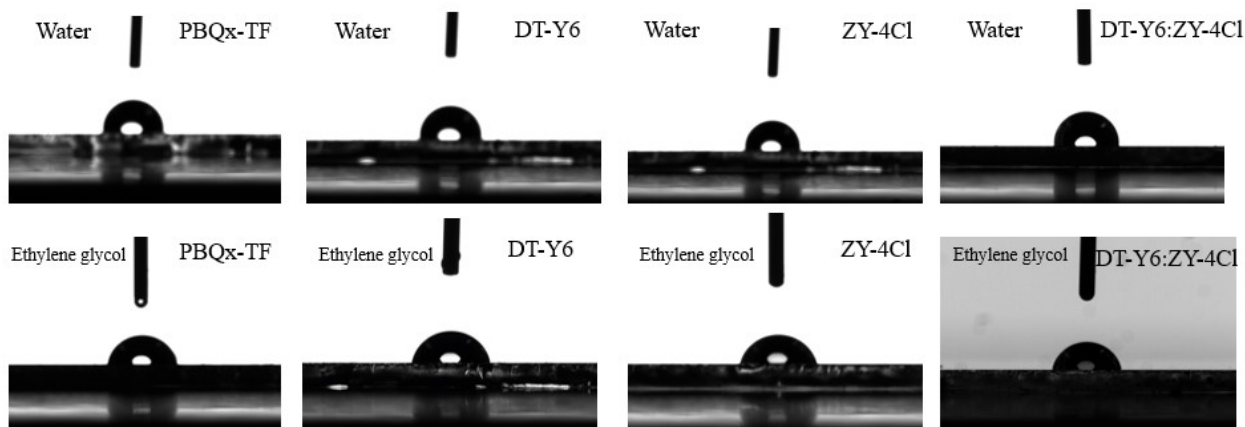

**Fig. S3** Contact angle images of pristine PBQx-TF, DT-Y6, ZY-4Cl and DT-Y6: ZY-4Cl with water and ethylene glycol droplets on top

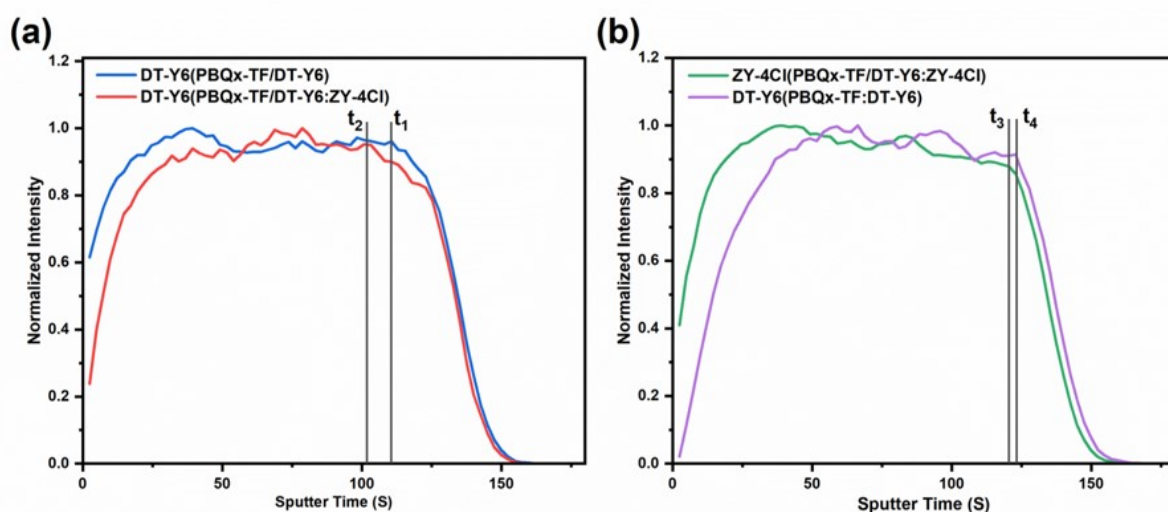

**Fig. S4** (a) The acromion sputtering time of DT-Y6 in binary LBL and ternary LBL devices. (b) The acromion sputtering time of DT-Y6 in binary BHJ device and ZY-4Cl in ternary LBL device.

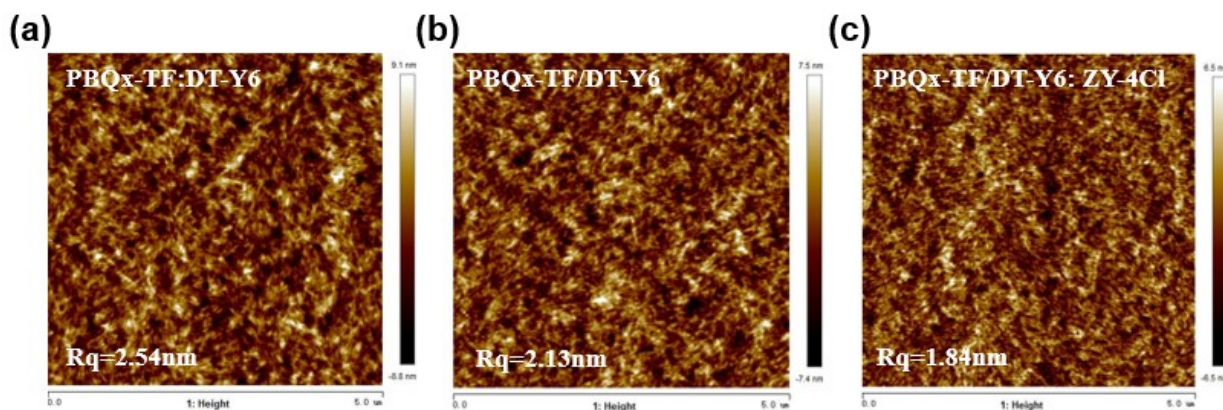

**Fig. S5** (a-c) AFM height images of corresponding films.

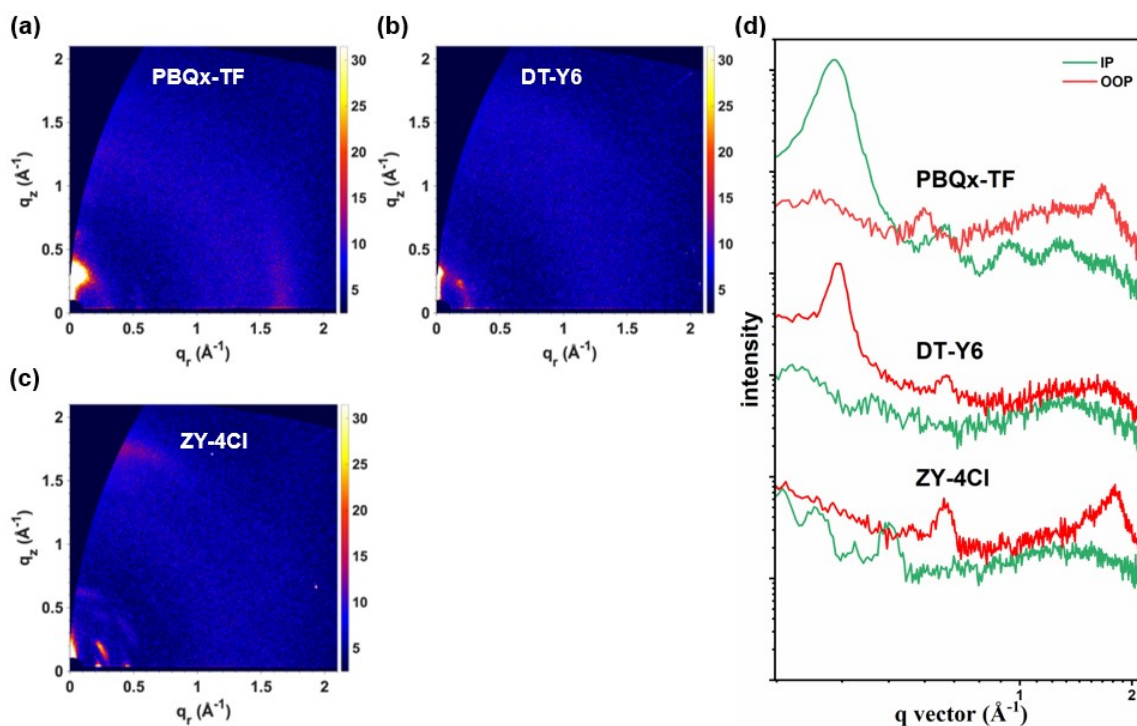

**Fig. S6** (a-c) 2D GIWAXS patterns of corresponding films. (d) 1D profiles of corresponding films.

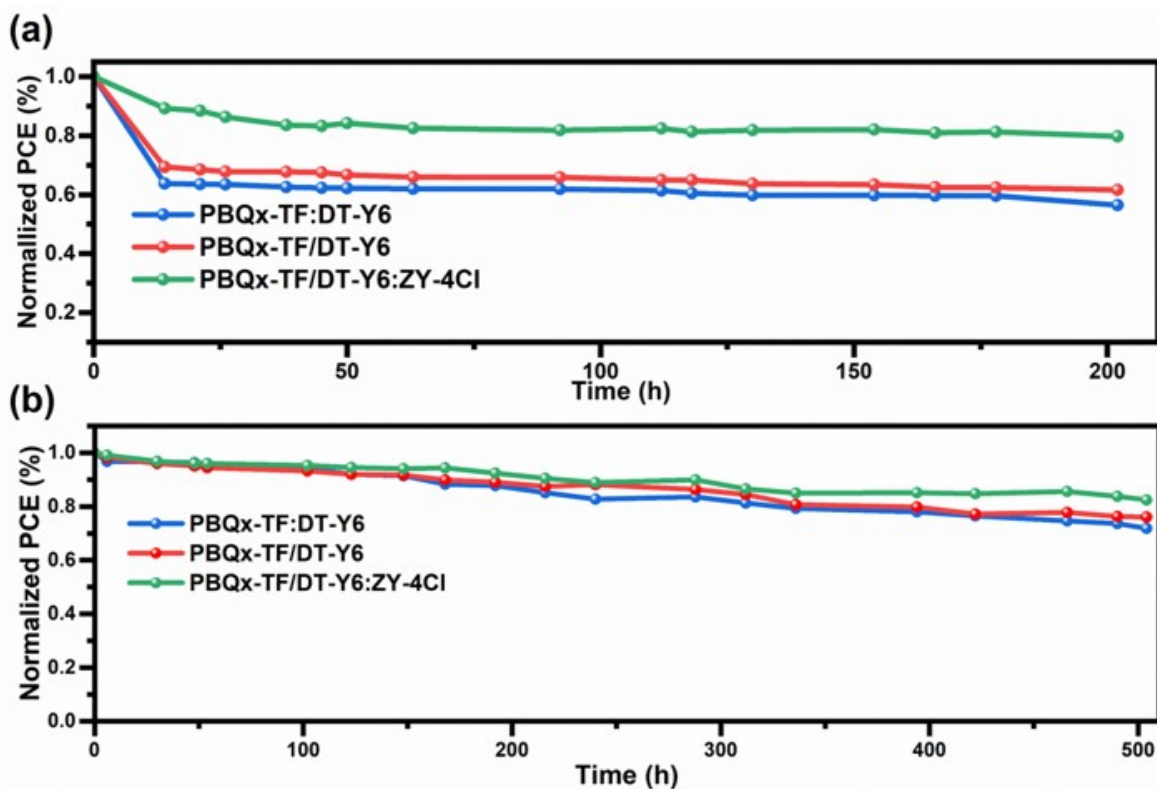

**Fig. S7** (a) Photostability of each device under the simulated illumination of  $100 \text{ mW cm}^{-2}$ . (b) Thermal stability of each device under  $65 \text{ }^\circ\text{C}$  in the glove box.



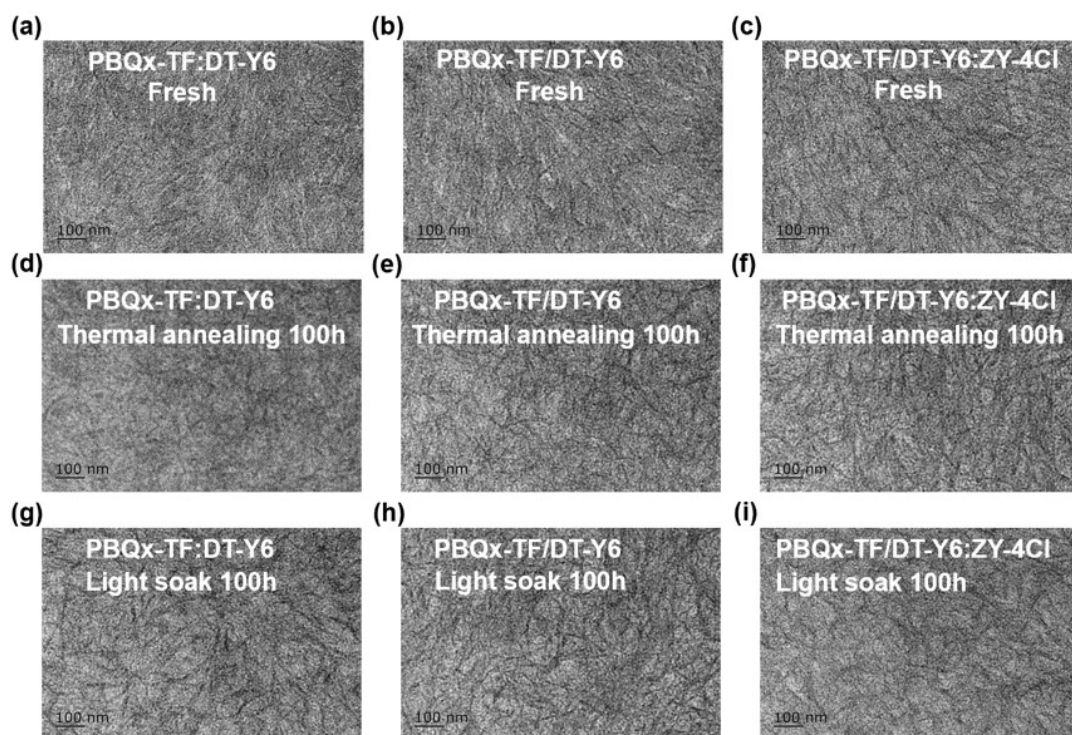

**Fig. S8** TEM images for blend films after heating or illumination.

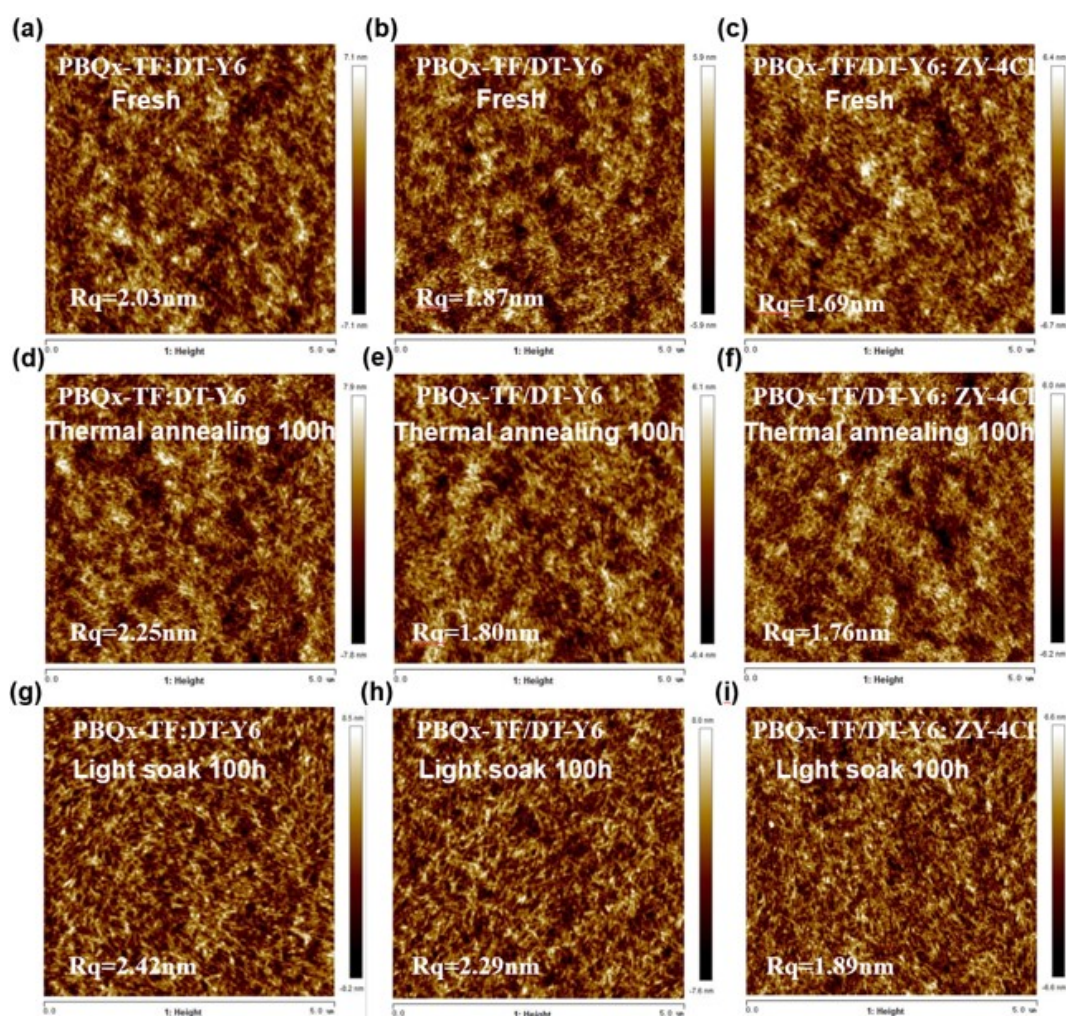

**Fig. S9** AFM images for blend films after heating or illumination.

**Table S1** The representative recent works on ternary BHJ and LBL OSCs

|     | Active layer         | $V_{OC}$<br>(V) | $J_{sc}$<br>(mA cm <sup>-2</sup> ) | FF<br>(%) | PCE<br>(%) | ref       |
|-----|----------------------|-----------------|------------------------------------|-----------|------------|-----------|
| BHJ | PM6:L8-BO:PY-IT      | 0.882           | 25.81                              | 78.9      | 17.97      | 6         |
|     | PM6:ec9:PY-IT        | 0.858           | 26.78                              | 79.2      | 18.19      | 7         |
|     | D18:T9TBO-F:Y6-O     | 0.87            | 26.93                              | 78.07     | 18.29      | 8         |
|     | PM6:L8-BO:BTP-eC9    | 0.886           | 27.22                              | 79.5      | 19.17      | 9         |
|     | PM6:BTTC:BTP-eC9     | 0.853           | 28.32                              | 79.40     | 19.18      | 10        |
|     | PM6:CH8-6:L8-BO      | 0.884           | 27.46                              | 78.6      | 19.2       | 11        |
|     | PM6:ec9:PCT-4Cl      | 0.865           | 27.90                              | 79.8      | 19.25      | 12        |
|     | PM6:ITOA:BTP-eC9     | 0.866           | 28.33                              | 78.79     | 19.33      | 13        |
|     | PB2:HLG:BTP-eC9      | 0.883           | 27.3                               | 80.8      | 19.5       | 14        |
|     | PM6:D18:L8-BO        | 0.896           | 26.7                               | 81.9      | 19.6       | 15        |
|     | PM6:PBTz-F:L8-BO     | 0.907           | 27.10                              | 80.06     | 19.68      | 16        |
|     | D18:LJ1:L8-BO        | 0.924           | 26.84                              | 79.12     | 19.78      | 17        |
|     | D18:Z8:L8-BO         | 0.92            | 27.2                               | 80.8      | 20.2       | 18        |
| LBL | PM6/L8-BO:PY-IT      | 0.876           | 26.66                              | 80.1      | 18.70      | 6         |
|     | D18/BS3TSe-4F:Y6-O   | 0.845           | 29.41                              | 76.56     | 19.03      | 19        |
|     | D18/T9TBO-F:Y6-O     | 0.87            | 27.9                               | 78.81     | 19.13      | 8         |
|     | PM1:D18/L8-BO        | 0.90            | 27.2                               | 78.53     | 19.13      | 20        |
|     | D18/L8-BO:ec9        | 0.88            | 27.63                              | 78.9      | 19.18      | 21        |
|     | PM6/ec9:PY-IT        | 0.859           | 27.79                              | 81.3      | 19.41      | 7         |
|     | PDTP-BDD:D18/L8-BO   | 0.905           | 26.90                              | 79.53     | 19.36      | 22        |
|     | PBQx-TF/DT-Y6:ZY-4Cl | 0.881           | 27.45                              | 80.43     | 19.46      | This work |
|     | D18/L8-BO            | 0.908           | 26.39                              | 81.59     | 19.55      | 23        |

**Table S2** Photovoltaic parameters of each device under simulated illumination of AM 1.5G, 100 mW cm<sup>-2</sup>.



| Active layer   | $V_{OC}$ (V)           | $J_{SC}$ (mA cm <sup>-2</sup> ) | FF(%)                 | PCE (%)          |
|----------------|------------------------|---------------------------------|-----------------------|------------------|
| PBQx-TF:ZY-4Cl | 1.021<br>(1.009±0.011) | 14.57<br>(12.80±1.55)           | 58.56<br>(58.68±0.11) | 8.76 (7.59±0.99) |

**Table S3** The hole and electron mobilities of each device.

| Device                   | $\mu_h$ (cm <sup>2</sup> V <sup>-1</sup> s <sup>-1</sup> ) | $\mu_e$ (cm <sup>2</sup> V <sup>-1</sup> s <sup>-1</sup> ) | $\mu_h/\mu_e$ |
|--------------------------|------------------------------------------------------------|------------------------------------------------------------|---------------|
| PBQx-TF:DT-Y6            | $5.10 \times 10^{-4}$                                      | $3.61 \times 10^{-4}$                                      | 1.41          |
| PBQx-TF/DT-Y6            | $6.13 \times 10^{-4}$                                      | $5.01 \times 10^{-4}$                                      | 1.22          |
| PBQx-TF/<br>DT-Y6:ZY-4Cl | $6.64 \times 10^{-4}$                                      | $5.81 \times 10^{-4}$                                      | 1.14          |

**Table S4** Fitting parameters of for impedance spectra of each device

| Device                   | $R_{transport}$ ( $\Omega$ ) | $C_{transport}$ (nF) | $R_{recombination}$ ( $\Omega$ ) | $C_{recombination}$ (nF) | $R_S$ ( $\Omega$ ) |
|--------------------------|------------------------------|----------------------|----------------------------------|--------------------------|--------------------|
| PBQx-TF:<br>DT-Y6        | 1520                         | 1.85                 | 901                              | 3.06                     | 15.49              |
| PBQx-TF/<br>DT-Y6        | 1210                         | 1.93                 | 727                              | 3.06                     | 12.26              |
| PBQx-TF/<br>DT-Y6:ZY-4Cl | 793                          | 1.12                 | 419                              | 1.32                     | 7.86               |

**Table S5** Trap DOS of each device

| Device               | $N_t$ (cm <sup>-3</sup> ) | $E_\omega$ (eV) |
|----------------------|---------------------------|-----------------|
| PBQx-TF:DT-Y6        | $1.15 \times 10^{17}$     | 0.51            |
| PBQx-TF/DT-Y6        | $8.26 \times 10^{16}$     | 0.51            |
| PBQx-TF/DT-Y6:ZY-4Cl | $8.27 \times 10^{16}$     | 0.50            |

**Table S6** Contact angles of water and ethylene glycol on films and surface energy values calculated by Owens method.

| Surface      | $\theta_{\text{Water}} [^\circ]$ | $\theta_{\text{EG}} [^\circ]$ | $\gamma^{\text{d}} [\text{mN m}^{-1}]$ | $\gamma^{\text{p}} [\text{mN m}^{-1}]^{\text{a}}$ | $\gamma [\text{mN m}^{-1}]^{\text{b}}$ |
|--------------|----------------------------------|-------------------------------|----------------------------------------|---------------------------------------------------|----------------------------------------|
| PBQx-TF      | 102.3                            | 83.2                          | 10.16                                  | 8.64                                              | 18.8                                   |
| DT-Y6        | 98.4                             | 77.2                          | 12.06                                  | 9.18                                              | 21.24                                  |
| ZY-4Cl       | 95.2                             | 77.8                          | 9.36                                   | 12.44                                             | 21.8                                   |
| DT-Y6:ZY-4Cl | 96.6                             | 77.5                          | 10.46                                  | 10.98                                             | 21.44                                  |

<sup>a</sup>  $\gamma^{\text{d}}$  and  $\gamma^{\text{p}}$  represent the surface free energies generated from the dispersion forces and the polar forces, respectively; <sup>b</sup>  $\gamma = \gamma^{\text{d}} + \gamma^{\text{p}}$

**Table S7** Interfacial energy ( $\gamma_{x:y}$ ) of each sample

|                | PBQx-TF:DT-Y6 | PBQx-TF:ZY-4Cl | DT-Y6:ZY-4Cl |
|----------------|---------------|----------------|--------------|
| $\gamma_{x:y}$ | 0.178k        | 0.717k         | 0.831k       |

The wetting coefficient ( $\delta$ ) of ZY-4Cl is calculated by:

$$\delta_{\text{ZY-4Cl}} = \frac{\gamma_{\text{PBQx-TF:ZY-4Cl}} - \gamma_{\text{DT-Y6:ZY-4Cl}}}{\gamma_{\text{PBQx-TF:DT-Y6}}}$$

**Table S8** Molecular packing parameters of corresponding films.

| Sample               | Peak         | Peak location ( $\text{\AA}^{-1}$ ) | $\pi$ - $\pi$ stacking distance ( $\text{\AA}$ ) | FWHM ( $\text{\AA}^{-1}$ ) | Crystal coherence length ( $\text{\AA}$ ) |
|----------------------|--------------|-------------------------------------|--------------------------------------------------|----------------------------|-------------------------------------------|
| PBQx-TF              | (100) In IP  | 0.31                                | \                                                | 0.044                      | 128.45                                    |
|                      | (010) In OOP | 1.67                                | 3.76                                             | 0.11                       | 51.38                                     |
| DT-Y6                | (100) In IP  | 0.25                                | \                                                | 0.051                      | 110.82                                    |
|                      | (010) In OOP | 1.59                                | 3.94                                             | 1.72                       | 3.28                                      |
| ZY-4Cl               | (100) In IP  | 0.282                               | \                                                | 0.024                      | 235.5                                     |
|                      | (010) In OOP | 1.77                                | 3.54                                             | 0.21                       | 26.91                                     |
| PBQx-TF:DT-Y6        | (100) In IP  | 0.294                               | \                                                | 0.061                      | 92.65                                     |
|                      | (010) In OOP | 1.70                                | 3.69                                             | 0.22                       | 25.69                                     |
| PBQx-TF/DT-Y6        | (100) In IP  | 0.301                               | \                                                | 0.050                      | 113.04                                    |
|                      | (010) In OOP | 1.71                                | 3.67                                             | 0.18                       | 31.40                                     |
| PBQx-TF/DT-Y6:ZY-4Cl | (100) In IP  | 0.300                               | \                                                | 0.052                      | 108.69                                    |
|                      | (010) In OOP | 1.72                                | 3.65                                             | 0.17                       | 33.24                                     |

- Z. Wu, C. Sun, S. Dong, X.-F. Jiang, S. Wu, H. Wu, H.-L. Yip, F. Huang and Y. Cao, *J. Am. Chem. Soc.*, 2016, **138**, 2004-2013.

2. C. Katagiri and K. Nakayama, *Appl. Phys. Express*, 2018, **11**, 011601.
3. I. Zonno, A. Martinez-Otero, J.-C. Hebig and T. Kirchartz, *Phys. Rev. Appl.*, 2017, **7**, 034018.
4. J. Jing, S. Dong, K. Zhang, B. Xie, J. Zhang, Y. Song and F. Huang, *Nano Energy*, 2022, **93**, 106814.
5. J. Zhang, Q. Zhou, J. Xie, J. Zhao, J. Yu, K. Zhang, T. Jia, F. Huang and Y. Cao, *Adv. Funct. Mater.*, 2024, **34**, 2313722.
6. R. Gui, K. Xian, Y. Shi, W. Zhang, J. Qiao, Z. Fu, J. Wang, F. Cui, Q. Wang, V. K. Wong, P. Lu, S. K. So, M. Zhang, L. Ye, G. Li, X. Hao and H. Yin, *Adv. Energy Mater.*, 2023, **13**, 2302029.
7. Y. Zhang, W. Deng, C. E. Petoukhoff, X. Xia, Y. Lang, H. Xia, H. Tang, H. T. Chandran, S. Mahadevan, K. Liu, P. W. K. Fong, Y. Luo, J. Wu, S.-W. Tsang, F. Laquai, H. Wu, X. Lu, Y. Yang and G. Li, *Joule*, 2024, **8**, 509-526.
8. K. Jiang, J. Zhang, C. Zhong, F. R. Lin, F. Qi, Q. Li, Z. Peng, W. Kaminsky, S.-H. Jang, J. Yu, X. Deng, H. Hu, D. Shen, F. Gao, H. Ade, M. Xiao, C. Zhang and A. K. Y. Jen, *Nat. Energy*, 2022, **7**, 1076-1086.
9. W. Su, X. Zhou, Z.-F. Yao, H. Bai, Y. Duan, R. Sun, Y. Wu, Q. Wu, H. Qin, C. Zhao, W. Zhu, H. Y. Woo, J. Min, Y. Li, W. Ma and Q. Fan, *Adv. Funct. Mater.*, 2024, **34**, 2313744.
10. J. Li, C. Zhang, X. Sun, H. Wang, H. Hu, K. Wang and M. Xiao, *Nano Energy*, 2024, **125**, 109542.
11. Z. Zhang, S. Yuan, T. Chen, J. Wang, Y.-Q.-Q. Yi, B. Zhao, M. Li, Z. Yao, C. Li, X. Wan, G. Long, B. Kan and Y. Chen, *Energy Environ. Sci.*, 2024, **17**, 5719-5729.
12. D. Luo, L. Zhang, J. Zeng, T. Dai, L. Li, W.-Y. Wong, B. Xu, E. Zhou, Y. Chen and A. K. K. Kyaw, *Nano Energy*, 2024, **125**, 109583.
13. C. Zhang, X. Zhong, X. Sun, J. Lv, Y. Ji, J. Fu, C. Zhao, Y. Yao, G. Zhang, W. Deng, K. Wang, G. Li and H. Hu, *Adv. Sci.*, 2024, **11**, 2401313.
14. Y. Wang, S. Zhang, J. Wang, J. Ren, J. Qiao, Z. Chen, Y. Yu, X.-T. Hao and J. Hou, *ACS Energy Letters*, 2024, **9**, 2420-2427.
15. L. Zhu, M. Zhang, J. Xu, C. Li, J. Yan, G. Zhou, W. Zhong, T. Hao, J. Song, X. Xue, Z. Zhou, R. Zeng, H. Zhu, C.-C. Chen, R. C. I. MacKenzie, Y. Zou, J. Nelson, Y. Zhang, Y. Sun and F. Liu, *Nat. Mater.*, 2022, **21**, 656-663.
16. T. Zhou, W. Jin, Y. Li, X. Xu, Y. Duan, R. Li, L. Yu and Q. Peng, *Adv. Sci.*, 2024, **11**, 2401405.
17. X. Jiang, X. Wang, Y. Wang, G. Ran, W. Liu, H. Lu, H. Li, N. Wei, Z. Wei, Y. Lin, Z. Ma, Y. Liu, W. Zhang, X. Xu and Z. Bo, *Adv. Funct. Mater.*, 2024, 2406744.
18. Y. Jiang, S. Sun, R. Xu, F. Liu, X. Miao, G. Ran, K. Liu, Y. Yi, W. Zhang and X. Zhu, *Nat. Energy*, 2024, **9**, 975-986.
19. W. Gao, F. Qi, Z. Peng, F. R. Lin, K. Jiang, C. Zhong, W. Kaminsky, Z. Guan, C.-S. Lee, T. J. Marks, H. Ade and A. K. Y. Jen, *Adv. Mater.*, 2022, **34**, 2202089.
20. Z. Liu, M. Zhang, L. Zhang, S. Y. Jeong, S. Geng, H. Y. Woo, J. Zhang, F. Zhang and X. Ma, *Chem. Eng. J.*, 2023, **471**, 144711.
21. Y. Xie, C. Zhou, X. Ma, S. Y. Jeong, H. Y. Woo, F. Huang, Y. Yang, H. Yu, J. Li, F. Zhang, K. Wang and X. Zhu, *Adv. Energy Mater.*, 2024, **14**, 2400013.
22. Y. He, W. Jing, C. Liao, X. Xu, Y. Duan, R. Li, L. Yu and Q. Peng, *Chem. Eng. J.*, 2024, **490**, 151920.
23. M. Xie, L. Zhu, J. Zhang, T. Wang, Y. Li, W. Zhang, Z. Fu, G. Zhao, X. Hao, Y. Lin, H. Zhou, Z. Wei and K. Lu, *Adv. Energy Mater.*, 2024, **14**, 2400214.
